# Supplementary material for: Identification and functional analysis of non-coding regulatory small RNA FenSr3 in Bacillus amyloliquefaciens LPB-18
Source: PeerJ. 2023 May 15;11:e15236. doi: 10.7717/peerj.15236 (PMC10194069; doi:10.7717/peerj.15236)
Supplement: Supplemental Information 5 [file peerj-11-15236-s005.xlsx]

## Sheet: Sheet1
id	CK-1	CK-2	CK-3	T1-1	T1-2	T1-3	Symbol
MUS_RS07215	139	392	134	35	33	31	abrB	fengycin biosynthesis
MUS_RS10365	592	332	588	1918	2386	1868	fenD
MUS_RS10365	502	232	478	1898	3286	1468	fenC
MUS_RS10365	488	613	573	1798	2986	2228	fenA
MUS_RS07220	1755	1404	1571	1782	1955	1835	kinC	Quorum sensing system
MUS_RS15985	415	360	385	761	870	1021	kinB
MUS_RS03180	2515	7963	2750	20	17	7	sigV
MUS_RS21595	28	21	12	39	29	29	phrA
MUS_RS01935	82	64	87	159	143	147	phrC
MUS_RS18065	8097	4300	7902	17069	22376	21560	degU
MUS_RS15990	105	95	118	196	192	257	kapB
MUS_RS07860	12	9	12	14	28	17	sigE
MUS_RS18000	10966	6949	10930	24083	16701	11819	hag
MUS_RS17460	26	14	26	884	1139	1166	epsG	Biofilm
MUS_RS17440	7	8	14	525	586	683	epsK
MUS_RS17440	7	8	14	525	586	683	epsK
MUS_RS17445	3	6	11	359	499	568	epsJ
MUS_RS17480	47	21	34	3316	4809	6019	epsC
MUS_RS12880	19	8	19	679	943	1073	sipW
MUS_RS12875	15	16	13	635	1065	1047	tasA
MUS_RS14260	411	191	329	399	463	303	spoVID	spore formation
MUS_RS12785	4	2	5	3	14	13	spoIIIAA
MUS_RS07800	17	30	17	34	44	50	spoVD
MUS_RS19465	15	25	40	39	34	47	slrA
MUS_RS18890	113	96	125	179	188	104	spo0F
MUS_RS04765	25	18	18	15	35	37	spoVR
MUS_RS12190	574	462	683	623	737	701	spoIIAA
MUS_RS12680	3988	2927	4046	3459	3921	5052	spo0A
MUS_RS19315	13	21	13	12	19	25	gerQ

## Sheet: Sheet2
id	CK-1	CK-2	CK-3	T1-1	T1-2	T1-3	Symbol	Carbon metabolism
MUS_RS08160	220	264	177	363	323	163	fabD
MUS_RS10375	34	35	34	30	45	35	scoB
MUS_RS16860	30	23	39	31	28	43	yvqK
MUS_RS19690	21	18	14	30	34	21	gmuF
MUS_RS04085	207	87	135	138	306	295	glvA
MUS_RS03215	3680	5239	3291	10376	11176	13497	gabP
MUS_RS14500	904	67	786	1675	2415	1812	fadB
MUS_RS08165	171	284	199	312	266	172	fabG
MUS_RS10255	40	32	26	67	87	91	yjmD
MUS_RS10745	275	288	309	318	314	297	azoR1	Energy synthesis
MUS_RS04130	1545	573	1394	1182	1175	1385	NQO1
MUS_RS18760	5567	3164	4778	4736	5233	5989	atpB
MUS_RS16860	30	23	39	31	28	43	yvqK
MUS_RS13570	230	237	168	390	307	361	yjgC
MUS_RS10145	222	93	207	306	320	435	ccdA
MUS_RS14260	411	191	329	399	463	303	spoVID
MUS_RS04660	348	225	390	480	542	356	yhcR
MUS_RS11855	1322	1203	1441	1530	2064	2190	ndk
MUS_RS17640	165	75	155	173	140	185	yvdD	Amino acid synthesis
MUS_RS05545	17	3	4	73	75	55	argC
MUS_RS14905	225	112	218	1769	1838	1835	argG
MUS_RS05560	31	22	32	306	331	248	argD
MUS_RS01445	8	2	2	113	136	154	ansZ
MUS_RS19175	3196	1583	2360	5816	6469	8187	bacF
MUS_RS05175	102	8	115	399	690	726	lcfB	Fatty acid biosynthesis
MUS_RS17220	14	29	21	32	54	34	opuBD
MUS_RS05565	11	4	9	169	181	118	carA
MUS_RS00890	1	0	0	7	14	12	cwlD
MUS_RS07060	47	28	54	59	73	71	ykuM
