# Supplementary material for: Identification and functional analysis of non-coding regulatory small RNA FenSr3 in Bacillus amyloliquefaciens LPB-18
Source: PeerJ journal article supplement (doi:10.7717/peerj.15236), 2023-05-15
Supplement: The_raw_data_of_Figure_3.zip [file The_raw_data_of_Figure_3.zip]

KEGG_A_class	KEGG_B_class	Pathway	CK-vs-T1 (389)	All (1224)	Pvalue	Qvalue	Pathway ID	Genes	K_IDs
Metabolism	Amino acid metabolism	Alanine, aspartate and glutamate metabolism	21	33	0.0001362837	0.01540006	ko00250	MUS_RS01145(glmS);MUS_RS01375(glsA1);MUS_RS01445(ansZ);MUS_RS02000(gabT);MUS_RS02005(gabD);MUS_RS03315(purB);MUS_RS05410(asnO);MUS_RS05565(carA);MUS_RS05570(carB);MUS_RS07950(pyrB);MUS_RS07960(pyrAA);MUS_RS07965(pyrAB);MUS_RS08965(glnA);MUS_RS10575(gltB);MUS_RS10580(gltA);MUS_RS14135(nadB);MUS_RS14900(argH);MUS_RS14905(argG);MUS_RS16210(ald);MUS_RS19225(rocA);MUS_RS19230(rocG)	K00820+K01425+K01424+K07250+K00135+K01756+K01953+K01956+K01955+K00609+K01956+K01955+K01915+K00266+K00265+K00278+K01755+K01940+K00259+K00294+K00260
Cellular Processes	Cell motility	Flagellar assembly	19	33	0.001704577	0.08033769	ko02040	MUS_RS06825(motB);MUS_RS06830(motA);MUS_RS08300(flgB);MUS_RS08305(flgC);MUS_RS08310(fliE);MUS_RS08315(fliF);MUS_RS08320(fliG);MUS_RS08325(fliH);MUS_RS08330(fliI);MUS_RS08345(fliK);MUS_RS08350(ylxG);MUS_RS08355(flgG);MUS_RS08370(fliM);MUS_RS08375(fliY);MUS_RS08385(fliZ);MUS_RS08390(fliP);MUS_RS17985(fliT);MUS_RS17990(fliS);MUS_RS18000(hag)	K02557+K02556+K02387+K02388+K02408+K02409+K02410+K02411+K02412+K02414+K02389+K02390+K02416+K02417+K02418+K02419+K02423+K02422+K02406
Metabolism	Amino acid metabolism	Arginine biosynthesis	13	20	0.002132859	0.08033769	ko00220	MUS_RS01375(glsA1);MUS_RS05545(argC);MUS_RS05550(argJ);MUS_RS05555(argB);MUS_RS05560(argD);MUS_RS05575(argF);MUS_RS08965(glnA);MUS_RS14900(argH);MUS_RS14905(argG);MUS_RS18650(ureC);MUS_RS18655(ureB);MUS_RS18660(ureA);MUS_RS19230(rocG)	K01425+K00145+K00620+K00930+K00821+K00611+K01915+K01755+K01940+K01428+K01429+K01430+K00260
Metabolism	Amino acid metabolism	Valine, leucine and isoleucine biosynthesis	8	13	0.02535004	0.58934020	ko00290	MUS_RS01355(ilvE);MUS_RS14330(leuD);MUS_RS14335(leuC);MUS_RS14340(leuB);MUS_RS14345(leuA);MUS_RS14350(ilvC);MUS_RS14355(ilvH);MUS_RS14360(ilvB)	K00826+K01704+K01703+K00052+K01649+K00053+K01653+K01652
Metabolism	Xenobiotics biodegradation and metabolism	Atrazine degradation	3	3	0.03193105	0.58934020	ko00791	MUS_RS18650(ureC);MUS_RS18655(ureB);MUS_RS18660(ureA)	K01428+K01429+K01430
Environmental Information Processing	Signal transduction	Two-component system	49	124	0.03367301	0.58934020	ko02020	MUS_RS01375(glsA1);MUS_RS01410(phoD);MUS_RS02305(dctR);MUS_RS02845(ydfJ);MUS_RS03180(sigV);MUS_RS03270(--);MUS_RS03745(DIT1);MUS_RS03785(citS);MUS_RS06400(xpf);MUS_RS06485(htrA);MUS_RS06830(motA);MUS_RS06995(cheV);MUS_RS07220(kinC);MUS_RS08380(cheY);MUS_RS08965(glnA);MUS_RS11850(cheR);MUS_RS12680(spo0A);MUS_RS14670(lrgB);MUS_RS14675(lrgA);MUS_RS15375(bceB);MUS_RS15380(bceA);MUS_RS15385(bceS);MUS_…	K01425+K01113+K11692+K11625+K03088+K03088+K03319+K11637+K03088+K04771+K02556+K03415+K07698+K03413+K01915+K00575+K07699+K05339+K05338+K11632+K11631+K11629+K11630+K00425+K03406+K03406+K07697+K06347+K07770+K07650+K11620+K11619+K02406+K07692+K01104+K04751+K00027+K02490+K00374+K00370+K03367+K03739+K14188+K03740+K00426+K00425+K11631+K07652+K00692
Metabolism	Biosynthesis of other secondary metabolites	Biosynthesis of various plant secondary metabolites	5	7	0.0365078	0.58934020	ko00999	MUS_RS19175(bacF);MUS_RS19185(bacD);MUS_RS19190(bacC);MUS_RS19195(bacB);MUS_RS19200(bacA)	K19549+K13037+K19548+K19547+K19546
Metabolism	Global and overview maps	2-Oxocarboxylic acid metabolism	14	29	0.04500798	0.63573772	ko01210	MUS_RS01355(ilvE);MUS_RS01945(yclM);MUS_RS05545(argC);MUS_RS05550(argJ);MUS_RS05555(argB);MUS_RS05560(argD);MUS_RS14330(leuD);MUS_RS14335(leuC);MUS_RS14340(leuB);MUS_RS14345(leuA);MUS_RS14350(ilvC);MUS_RS14355(ilvH);MUS_RS14360(ilvB);MUS_RS14790(citZ)	K00826+K00928+K00145+K00620+K00930+K00821+K01704+K01703+K00052+K01649+K00053+K01653+K01652+K01647
Cellular Processes	Cell motility	Bacterial chemotaxis	11	22	0.0559036	0.68606328	ko02030	MUS_RS06825(motB);MUS_RS06830(motA);MUS_RS06995(cheV);MUS_RS08320(fliG);MUS_RS08370(fliM);MUS_RS08375(fliY);MUS_RS08380(cheY);MUS_RS11850(cheR);MUS_RS15850(mcpA);MUS_RS15855(tlpA);MUS_RS18305(rbsB)	K02557+K02556+K03415+K02410+K02416+K02417+K03413+K00575+K03406+K03406+K10439
Metabolism	Carbohydrate metabolism	Fructose and mannose metabolism	10	20	0.06731313	0.68606328	ko00051	MUS_RS02045(mtlF);MUS_RS02050(mtlD);MUS_RS03130(gutB);MUS_RS09925(xylA);MUS_RS13510(manA);MUS_RS13515(manP);MUS_RS18785(rpiB);MUS_RS19685(scrK);MUS_RS19690(gmuF);MUS_RS19695(gmuG)	K02798+K00009+K00008+K01805+K01809+K02768+K01808+K00847+K01809+K01218
Metabolism	Metabolism of cofactors and vitamins	Thiamine metabolism	10	20	0.06731313	0.68606328	ko00730	MUS_RS03050(thiL);MUS_RS04430(thiC);MUS_RS05785(tenA);MUS_RS05790(tenI);MUS_RS05795(thiO);MUS_RS05805(thiG);MUS_RS05810(thiF);MUS_RS05815(thiD);MUS_RS08110(thiN);MUS_RS14140(iscS)	K00946+K03147+K03707+K10810+K03153+K03149+K03148+K00941+K00949+K04487
Metabolism	Metabolism of cofactors and vitamins	Nicotinate and nicotinamide metabolism	7	13	0.0815194	0.68606328	ko00760	MUS_RS01625(nadE);MUS_RS02005(gabD);MUS_RS03900(yfkN);MUS_RS04660(yhcR);MUS_RS14125(nadA);MUS_RS14130(nadC);MUS_RS14135(nadB)	K01916+K00135+K08693+K01081+K03517+K00767+K00278
Metabolism	Global and overview maps	Metabolic pathways	198	586	0.0831947	0.68606328	ko01100	MUS_RS00085(glxK);MUS_RS00400(coaX);MUS_RS00435(sul);MUS_RS00440(folB);MUS_RS00445(folK);MUS_RS00590(cysE);MUS_RS01145(glmS);MUS_RS01355(ilvE);MUS_RS01375(glsA1);MUS_RS01410(phoD);MUS_RS01445(ansZ);MUS_RS01450(estA);MUS_RS01490(ycdF);MUS_RS01585(amyE);MUS_RS01625(nadE);MUS_RS01665(putB);MUS_RS01725(adhB);MUS_RS01755(hxlB);MUS_RS01825(bsdB);MUS_RS01945(yclM);MUS_RS02000(gabT);MUS_RS02005(gabD);MUS…	K00865+K03525+K00796+K01633+K00950+K00640+K00820+K00826+K01425+K01113+K01424+K01046+K00034+K01176+K01916+K00318+K00121+K08094+K03186+K00928+K07250+K00135+K01921+K01929+K01775+K00005+K00946+K00008+K01756+K01923+K01952+K08693+K00627+K07104+K03147+K01081+K00864+K00655+K01772+K00648+K03800+K01897+K01953+K00145+K00620+K00930+K00821+K01956+K01955+K00611+K03707+K10810+K03153+K03149+K03148+K00941+K00208+…
Metabolism	Metabolism of other amino acids	D-Alanine metabolism	4	6	0.08499899	0.68606328	ko00473	MUS_RS02355(ddl);MUS_RS02395(alr1);MUS_RS19585(dltA);MUS_RS19595(dltC)	K01921+K01775+K03367+K14188
Metabolism	Carbohydrate metabolism	Galactose metabolism	10	21	0.0933383	0.69581643	ko00052	MUS_RS06180(galT);MUS_RS06185(galE);MUS_RS06190(galK);MUS_RS06195(lacE);MUS_RS06200(lacF);MUS_RS06205(lacG);MUS_RS10510(galM);MUS_RS15335(melA);MUS_RS15885(yugT);MUS_RS19770(galE)	K00965+K01784+K00849+K02787+K02786+K01220+K01785+K07406+K01187+K01784
Metabolism	Lipid metabolism	Glycerolipid metabolism	8	16	0.09852268	0.69581643	ko00561	MUS_RS00085(glxK);MUS_RS01450(estA);MUS_RS02870(gldA);MUS_RS04710(glpK);MUS_RS04820(plsC);MUS_RS08155(plsX);MUS_RS11145(ypkP);MUS_RS15335(melA)	K00865+K01046+K00005+K00864+K00655+K03621+K00655+K07406
Metabolism	Global and overview maps	Biosynthesis of amino acids	43	116	0.1195379	0.72131468	ko01230	MUS_RS00590(cysE);MUS_RS01355(ilvE);MUS_RS01755(hxlB);MUS_RS01945(yclM);MUS_RS05545(argC);MUS_RS05550(argJ);MUS_RS05555(argB);MUS_RS05560(argD);MUS_RS05575(argF);MUS_RS06630(metE);MUS_RS08140(sdaAA);MUS_RS08965(glnA);MUS_RS10575(gltB);MUS_RS10580(gltA);MUS_RS11800(hisC);MUS_RS11805(trpA);MUS_RS11810(trpB);MUS_RS11815(trpF);MUS_RS11820(trpC);MUS_RS11825(trpD);MUS_RS11830(trpE);MUS_RS11845(aroC);MU…	K00640+K00826+K08094+K00928+K00145+K00620+K00930+K00821+K00611+K00549+K01752+K01915+K00266+K00265+K00817+K01695+K01696+K01817+K01609+K00766+K01657+K01736+K00058+K06209+K01704+K01703+K00052+K01649+K00053+K01653+K01652+K00134+K01647+K00873+K01755+K01940+K00789+K14155+K00872+K01733+K00003+K01808+K00549
Metabolism	Biosynthesis of other secondary metabolites	Prodigiosin biosynthesis	5	9	0.121283	0.72131468	ko00333	MUS_RS05820(fabI);MUS_RS08160(fabD);MUS_RS08165(fabG);MUS_RS10365(fenF);MUS_RS17140(yvaG)	K00208+K00645+K00059+K00645+K00059
Metabolism	Carbohydrate metabolism	C5-Branched dibasic acid metabolism	5	9	0.121283	0.72131468	ko00660	MUS_RS14330(leuD);MUS_RS14335(leuC);MUS_RS14340(leuB);MUS_RS14355(ilvH);MUS_RS14360(ilvB)	K01704+K01703+K00052+K01653+K01652
Metabolism	Metabolism of other amino acids	Taurine and hypotaurine metabolism	4	7	0.1496539	0.80629917	ko00430	MUS_RS10540(ggt);MUS_RS16210(ald);MUS_RS18370(ywrD);MUS_RS19230(rocG)	K00681+K00259+K00681+K00260
Metabolism	Nucleotide metabolism	Pyrimidine metabolism	20	51	0.1559319	0.80629917	ko00240	MUS_RS03900(yfkN);MUS_RS04660(yhcR);MUS_RS05565(carA);MUS_RS05570(carB);MUS_RS07950(pyrB);MUS_RS07955(pyrC);MUS_RS07960(pyrAA);MUS_RS07965(pyrAB);MUS_RS07970(pyrK);MUS_RS07975(pyrD);MUS_RS08055(rpoZ);MUS_RS08470(pyrH);MUS_RS08920(nrdE);MUS_RS11155(thyA);MUS_RS11855(ndk);MUS_RS13315(yqeN);MUS_RS13890(udk);MUS_RS14855(dnaE);MUS_RS17640(yvdD);MUS_RS19960(pdp)	K08693+K01081+K01956+K01955+K00609+K01465+K01956+K01955+K02823+K17828+K03060+K09903+K00525+K00560+K00940+K02340+K00876+K02337+K06966+K00756
Metabolism	Energy metabolism	Oxidative phosphorylation	14	34	0.1569786	0.80629917	ko00190	MUS_RS07665(ctaC);MUS_RS07670(ctaD);MUS_RS07675(ctaE);MUS_RS07680(ctaF);MUS_RS11760(qcrB);MUS_RS11765(qcrA);MUS_RS15560(cydA);MUS_RS18730(atpD);MUS_RS18735(atpG);MUS_RS18755(atpE);MUS_RS18760(atpB);MUS_RS19425(qoxC);MUS_RS19730(cydB);MUS_RS19735(cydA)	K02275+K02274+K02276+K02277+K03887+K03886+K00425+K02112+K02115+K02110+K02108+K02828+K00426+K00425
Environmental Information Processing	Membrane transport	ABC transporters	47	131	0.1667426	0.81921364	ko02010	MUS_RS01040(feuC);MUS_RS01045(feuB);MUS_RS01050(feuA);MUS_RS01500(znuA);MUS_RS01505(znuC);MUS_RS01510(znuB);MUS_RS01805(tcyC);MUS_RS01810(tcyB);MUS_RS01815(tcyA);MUS_RS01890(yxeN);MUS_RS01950(yclN);MUS_RS01955(yclO);MUS_RS01960(yclP);MUS_RS01965(yclQ);MUS_RS04900(yheI);MUS_RS06645(--);MUS_RS06650(ecfA1);MUS_RS15320(msmE);MUS_RS15325(msmF);MUS_RS15330(yurM);MUS_RS15375(bceB);MUS_RS15380(bceA);MUS_…	K02015+K02015+K02016+K09815+K09817+K09816+K10010+K10009+K02424+K16959+K02015+K02015+K02013+K02016+K18889+K16785+K16786+K10117+K10118+K10119+K11632+K11631+K10119+K10118+K10117+K02073+K02072+K02071+K02013+K02015+K02016+K02020+K02018+K16959+K16958+K16957+K16956+K05846+K05845+K05847+K10440+K10439+K16012+K16013+K10112+K02016+K11631
Metabolism	Amino acid metabolism	Glycine, serine and threonine metabolism	13	32	0.1838257	0.83488312	ko00260	MUS_RS00085(glxK);MUS_RS01945(yclM);MUS_RS07335(pdhD);MUS_RS08140(sdaAA);MUS_RS11805(trpA);MUS_RS11810(trpB);MUS_RS12010(serA);MUS_RS12840(gcvPB);MUS_RS12845(gcvPA);MUS_RS15780(gbsA);MUS_RS16400(thrB);MUS_RS16405(thrC);MUS_RS16410(hom)	K00865+K00928+K00382+K01752+K01695+K01696+K00058+K00283+K00282+K00130+K00872+K01733+K00003
Metabolism	Metabolism of other amino acids	Cyanoamino acid metabolism	3	5	0.1870064	0.83488312	ko00460	MUS_RS01445(ansZ);MUS_RS10540(ggt);MUS_RS18370(ywrD)	K01424+K00681+K00681
Environmental Information Processing	Membrane transport	Phosphotransferase system (PTS)	9	21	0.192097	0.83488312	ko02060	MUS_RS02045(mtlF);MUS_RS06195(lacE);MUS_RS06200(lacF);MUS_RS13515(manP);MUS_RS19545(licC);MUS_RS19615(licA);MUS_RS19620(licC);MUS_RS19625(licB);MUS_RS19670(gmuA)	K02798+K02787+K02786+K02768+K02761+K02759+K02761+K02760+K02759
Metabolism	Carbohydrate metabolism	Glyoxylate and dicarboxylate metabolism	13	33	0.22025	0.88454062	ko00630	MUS_RS00085(glxK);MUS_RS02920(ycsA);MUS_RS04470(katA);MUS_RS07335(pdhD);MUS_RS08965(glnA);MUS_RS10260(--);MUS_RS11740(oxdC);MUS_RS12840(gcvPB);MUS_RS12845(gcvPA);MUS_RS13570(yjgC);MUS_RS14575(glcD);MUS_RS14580(glcF);MUS_RS14790(citZ)	K00865+K07246+K03781+K00382+K01915+K01625+K01569+K00283+K00282+K00123+K00104+K11473+K01647
Metabolism	Energy metabolism	Photosynthesis	4	8	0.227006	0.88454062	ko00195	MUS_RS18730(atpD);MUS_RS18735(atpG);MUS_RS18755(atpE);MUS_RS18760(atpB)	K02112+K02115+K02110+K02108
Metabolism	Xenobiotics biodegradation and metabolism	Benzoate degradation	4	8	0.227006	0.88454062	ko00362	MUS_RS04115(catE);MUS_RS14500(fadB);MUS_RS16690(fadA);MUS_RS16695(fadN)	K07104+K13767+K00632+K07516
Metabolism	Energy metabolism	Nitrogen metabolism	7	17	0.275944	0.94506807	ko00910	MUS_RS08965(glnA);MUS_RS10575(gltB);MUS_RS10580(gltA);MUS_RS17655(--);MUS_RS18945(narI);MUS_RS18960(narG);MUS_RS19230(rocG)	K01915+K00266+K00265+K01673+K00374+K00370+K00260
Metabolism	Metabolism of terpenoids and polyketides	Biosynthesis of siderophore group nonribosomal peptides	3	6	0.2890137	0.94506807	ko01053	MUS_RS15615(menF);MUS_RS16225(dhbF);MUS_RS16245(dhbA)	K02552+K04780+K00216
Metabolism	Amino acid metabolism	Phenylalanine, tyrosine and tryptophan biosynthesis	9	23	0.2891369	0.94506807	ko00400	MUS_RS11800(hisC);MUS_RS11805(trpA);MUS_RS11810(trpB);MUS_RS11815(trpF);MUS_RS11820(trpC);MUS_RS11825(trpD);MUS_RS11830(trpE);MUS_RS11845(aroC);MUS_RS14155(RBAM_024960)	K00817+K01695+K01696+K01817+K01609+K00766+K01657+K01736+K06209
Metabolism	Global and overview maps	Fatty acid metabolism	11	29	0.296562	0.94506807	ko01212	MUS_RS05140(fabHB);MUS_RS05175(lcfB);MUS_RS05820(fabI);MUS_RS08160(fabD);MUS_RS08165(fabG);MUS_RS10365(fenF);MUS_RS12745(accB);MUS_RS14500(fadB);MUS_RS16690(fadA);MUS_RS16695(fadN);MUS_RS17140(yvaG)	K00648+K01897+K00208+K00645+K00059+K00645+K02160+K13767+K00632+K07516+K00059
Metabolism	Global and overview maps	Degradation of aromatic compounds	4	9	0.3115845	0.94506807	ko01220	MUS_RS01725(adhB);MUS_RS01825(bsdB);MUS_RS01830(bsdC);MUS_RS04115(catE)	K00121+K03186+K01612+K07104
Metabolism	Biosynthesis of other secondary metabolites	Phenazine biosynthesis	1	1	0.3178105	0.94506807	ko00405	MUS_RS11830(trpE)	K01657
Metabolism	Lipid metabolism	alpha-Linolenic acid metabolism	1	1	0.3178105	0.94506807	ko00592	MUS_RS16690(fadA)	K00632
Metabolism	Xenobiotics biodegradation and metabolism	Ethylbenzene degradation	1	1	0.3178105	0.94506807	ko00642	MUS_RS16690(fadA)	K00632
Metabolism	Xenobiotics biodegradation and metabolism	Styrene degradation	1	1	0.3178105	0.94506807	ko00643	MUS_RS04115(catE)	K07104
Metabolism	Metabolism of other amino acids	D-Glutamine and D-glutamate metabolism	2	4	0.3797924	0.99990720	ko00471	MUS_RS01375(glsA1);MUS_RS14430(murI)	K01425+K01776
Organismal Systems	Environmental adaptation	Plant-pathogen interaction	2	4	0.3797924	0.99990720	ko04626	MUS_RS04710(glpK);MUS_RS18000(hag)	K00864+K02406
Metabolism	Metabolism of other amino acids	Selenocompound metabolism	4	10	0.3982513	0.99990720	ko00450	MUS_RS06630(metE);MUS_RS08000(sat);MUS_RS15980(patB);MUS_RS19785(yxjG)	K00549+K00958+K14155+K00549
Metabolism	Carbohydrate metabolism	Pentose and glucuronate interconversions	7	19	0.3987884	0.99990720	ko00040	MUS_RS03130(gutB);MUS_RS03740(pel);MUS_RS09925(xylA);MUS_RS09930(xylB);MUS_RS10255(yjmD);MUS_RS10265(uxuA);MUS_RS16885(Saci_1674)	K00008+K01728+K01805+K00854+K08322+K01686+K14274
Metabolism	Nucleotide metabolism	Purine metabolism	21	63	0.4413351	0.99990720	ko00230	MUS_RS03315(purB);MUS_RS03320(purC);MUS_RS03335(purL);MUS_RS03900(yfkN);MUS_RS04660(yhcR);MUS_RS08000(sat);MUS_RS08005(cysC);MUS_RS08055(rpoZ);MUS_RS08920(nrdE);MUS_RS11855(ndk);MUS_RS13315(yqeN);MUS_RS14415(ysnA);MUS_RS14825(pyk);MUS_RS14855(dnaE);MUS_RS16305(guaC);MUS_RS16475(allB);MUS_RS16510(pucF);MUS_RS17640(yvdD);MUS_RS18650(ureC);MUS_RS18655(ureB);MUS_RS18660(ureA)	K01756+K01923+K01952+K08693+K01081+K00958+K00860+K03060+K00525+K00940+K02340+K02428+K00873+K02337+K00364+K01466+K02083+K06966+K01428+K01429+K01430
Metabolism	Carbohydrate metabolism	Butanoate metabolism	8	23	0.45522	0.99990720	ko00650	MUS_RS02000(gabT);MUS_RS02005(gabD);MUS_RS02920(ycsA);MUS_RS03185(bdhA);MUS_RS10375(scoB);MUS_RS14355(ilvH);MUS_RS14360(ilvB);MUS_RS16695(fadN)	K07250+K00135+K07246+K00004+K01029+K01653+K01652+K07516
Metabolism	Metabolism of terpenoids and polyketides	Nonribosomal peptide structures	4	11	0.4827969	0.99990720	ko01054	MUS_RS01775(srfAA);MUS_RS10350(mycC);MUS_RS10355(mycB);MUS_RS10360(mycA)	K15654+K15663+K15662+K15661
Metabolism	Metabolism of cofactors and vitamins	Vitamin B6 metabolism	2	5	0.5083164	0.99990720	ko00750	MUS_RS16405(thrC);MUS_RS19360(pdxK)	K01733+K00868
Metabolism	Lipid metabolism	Fatty acid biosynthesis	8	24	0.5119178	0.99990720	ko00061	MUS_RS05140(fabHB);MUS_RS05175(lcfB);MUS_RS05820(fabI);MUS_RS08160(fabD);MUS_RS08165(fabG);MUS_RS10365(fenF);MUS_RS12745(accB);MUS_RS17140(yvaG)	K00648+K01897+K00208+K00645+K00059+K00645+K02160+K00059
Metabolism	Metabolism of terpenoids and polyketides	Geraniol degradation	1	2	0.5347947	0.99990720	ko00281	MUS_RS16690(fadA)	K00632
Metabolism	Lipid metabolism	Sphingolipid metabolism	1	2	0.5347947	0.99990720	ko00600	MUS_RS15335(melA)	K07406
Metabolism	Xenobiotics biodegradation and metabolism	Xylene degradation	1	2	0.5347947	0.99990720	ko00622	MUS_RS04115(catE)	K07104
Metabolism	Global and overview maps	Biosynthesis of antibiotics	67	212	0.5539689	0.99990720	ko01130	MUS_RS00085(glxK);MUS_RS01145(glmS);MUS_RS01355(ilvE);MUS_RS01665(putB);MUS_RS01725(adhB);MUS_RS01945(yclM);MUS_RS03315(purB);MUS_RS03320(purC);MUS_RS03335(purL);MUS_RS04065(acoC);MUS_RS04470(katA);MUS_RS05545(argC);MUS_RS05550(argJ);MUS_RS05555(argB);MUS_RS05560(argD);MUS_RS05575(argF);MUS_RS05820(fabI);MUS_RS07335(pdhD);MUS_RS08000(sat);MUS_RS08140(sdaAA);MUS_RS08160(fabD);MUS_RS08165(fabG);MUS…	K00865+K00820+K00826+K00318+K00121+K00928+K01756+K01923+K01952+K00627+K03781+K00145+K00620+K00930+K00821+K00611+K00208+K00382+K00958+K01752+K00645+K00059+K00645+K01785+K00266+K00265+K00817+K01695+K01696+K01817+K01609+K00766+K01657+K01736+K00940+K01823+K00058+K02160+K00283+K00282+K03526+K01809+K06209+K00053+K01653+K01652+K00104+K11473+K00134+K01647+K00873+K01755+K01940+K02552+K00216+K00003+K00632+…
Metabolism	Metabolism of cofactors and vitamins	Ubiquinone and other terpenoid-quinone biosynthesis	4	12	0.5621498	0.99990720	ko00130	MUS_RS01825(bsdB);MUS_RS04130(NQO1);MUS_RS15615(menF);MUS_RS19575(menA)	K03186+K00355+K02552+K02548
Metabolism	Carbohydrate metabolism	Pentose phosphate pathway	8	25	0.5665478	0.99990720	ko00030	MUS_RS01490(ycdF);MUS_RS01755(hxlB);MUS_RS10250(kdgK);MUS_RS10260(--);MUS_RS17365(gntK);MUS_RS18285(rbsK);MUS_RS18785(rpiB);MUS_RS19970(deoC)	K00034+K08094+K00874+K01625+K00851+K00852+K01808+K01619
Metabolism	Metabolism of cofactors and vitamins	Folate biosynthesis	8	25	0.5665478	0.99990720	ko00790	MUS_RS00425(pabA);MUS_RS00430(pabC);MUS_RS00435(sul);MUS_RS00440(folB);MUS_RS00445(folK);MUS_RS01410(phoD);MUS_RS11150(dfrA);MUS_RS16965(yvgK)	K01664+K02619+K00796+K01633+K00950+K01113+K00287+K03750
Metabolism	Carbohydrate metabolism	Starch and sucrose metabolism	12	38	0.5730046	0.99990720	ko00500	MUS_RS01585(amyE);MUS_RS04085(glvA);MUS_RS15885(yugT);MUS_RS19545(licC);MUS_RS19610(licH);MUS_RS19615(licA);MUS_RS19620(licC);MUS_RS19625(licB);MUS_RS19670(gmuA);MUS_RS19685(scrK);MUS_RS20575(sacB);MUS_RS20580(levB)	K01176+K01232+K01187+K02761+K01222+K02759+K02761+K02760+K02759+K00847+K00692+K01212
Metabolism	Amino acid metabolism	Tyrosine metabolism	3	9	0.5843829	0.99990720	ko00350	MUS_RS01725(adhB);MUS_RS02005(gabD);MUS_RS11800(hisC)	K00121+K00135+K00817
Metabolism	Xenobiotics biodegradation and metabolism	Aminobenzoate degradation	3	9	0.5843829	0.99990720	ko00627	MUS_RS01825(bsdB);MUS_RS01830(bsdC);MUS_RS03675(yfmT)	K03186+K01612+K21802
Genetic Information Processing	Folding, sorting and degradation	Protein export	6	19	0.5940601	0.99990720	ko03060	MUS_RS00625(secE);MUS_RS03090(tatAy);MUS_RS12120(sipA);MUS_RS12500(misCB);MUS_RS12880(sipW);MUS_RS14075(yrbF)	K03073+K03116+K03100+K03217+K13280+K03210
Metabolism	Lipid metabolism	Fatty acid degradation	5	16	0.6119325	0.99990720	ko00071	MUS_RS01725(adhB);MUS_RS05175(lcfB);MUS_RS14500(fadB);MUS_RS16690(fadA);MUS_RS16695(fadN)	K00121+K01897+K13767+K00632+K07516
Metabolism	Lipid metabolism	Biosynthesis of unsaturated fatty acids	2	6	0.6179677	0.99990720	ko01040	MUS_RS08165(fabG);MUS_RS17140(yvaG)	K00059+K00059
Metabolism	Metabolism of cofactors and vitamins	Pantothenate and CoA biosynthesis	6	20	0.6511484	0.99990720	ko00770	MUS_RS00400(coaX);MUS_RS01355(ilvE);MUS_RS12345(coaA);MUS_RS14350(ilvC);MUS_RS14355(ilvH);MUS_RS14360(ilvB)	K03525+K00826+K00867+K00053+K01653+K01652
Metabolism	Xenobiotics biodegradation and metabolism	Chlorocyclohexane and chlorobenzene degradation	1	3	0.6828838	0.99990720	ko00361	MUS_RS04115(catE)	K07104
Metabolism	Xenobiotics biodegradation and metabolism	Naphthalene degradation	1	3	0.6828838	0.99990720	ko00626	MUS_RS01725(adhB)	K00121
Metabolism	Metabolism of cofactors and vitamins	Lipoic acid metabolism	1	3	0.6828838	0.99990720	ko00785	MUS_RS05165(lplJ)	K03800
Environmental Information Processing	Membrane transport	Bacterial secretion system	4	14	0.6983596	0.99990720	ko03070	MUS_RS00625(secE);MUS_RS03090(tatAy);MUS_RS12500(misCB);MUS_RS14075(yrbF)	K03073+K03116+K03217+K03210
Metabolism	Amino acid metabolism	Cysteine and methionine metabolism	11	38	0.7064196	0.99990720	ko00270	MUS_RS00590(cysE);MUS_RS01355(ilvE);MUS_RS01945(yclM);MUS_RS06630(metE);MUS_RS06770(mtnA);MUS_RS06775(mtnK);MUS_RS08140(sdaAA);MUS_RS15480(metK);MUS_RS15980(patB);MUS_RS16410(hom);MUS_RS19785(yxjG)	K00640+K00826+K00928+K00549+K08963+K00899+K01752+K00789+K14155+K00003+K00549
Metabolism	Lipid metabolism	Synthesis and degradation of ketone bodies	2	7	0.7077414	0.99990720	ko00072	MUS_RS10375(scoB);MUS_RS16735(adc)	K01029+K01574
Genetic Information Processing	Replication and repair	DNA replication	5	18	0.7260612	0.99990720	ko03030	MUS_RS08240(rnhB);MUS_RS13145(dnaG);MUS_RS13315(yqeN);MUS_RS14855(dnaE);MUS_RS18505(ssbB)	K03470+K02316+K02340+K02337+K03111
Cellular Processes	Cellular community - prokaryotes	Quorum sensing	21	72	0.7298669	0.99990720	ko02024	MUS_RS00625(secE);MUS_RS01775(srfAA);MUS_RS01935(phrC);MUS_RS03740(pel);MUS_RS05175(lcfB);MUS_RS05190(apr);MUS_RS05245(comK);MUS_RS05655(appC);MUS_RS06535(appF);MUS_RS08900(hfq);MUS_RS11830(trpE);MUS_RS12110(ribD);MUS_RS12120(sipA);MUS_RS12500(misCB);MUS_RS12680(spo0A);MUS_RS14075(yrbF);MUS_RS18065(degU);MUS_RS18890(spo0F);MUS_RS19550(epr);MUS_RS19695(gmuG);MUS_RS21595(phrA)	K03073+K15654+K06353+K01728+K01897+K01342+K02250+K02034+K02032+K03666+K01657+K11752+K03100+K03217+K07699+K03210+K07692+K02490+K13277+K01218+K06352
Metabolism	Amino acid metabolism	Valine, leucine and isoleucine degradation	6	22	0.7494882	0.99990720	ko00280	MUS_RS01355(ilvE);MUS_RS02000(gabT);MUS_RS06965(ykwC);MUS_RS07335(pdhD);MUS_RS10375(scoB);MUS_RS16690(fadA)	K00826+K07250+K00020+K00382+K01029+K00632
Metabolism	Glycan biosynthesis and metabolism	Peptidoglycan biosynthesis	8	29	0.7514716	0.99990720	ko00550	MUS_RS02355(ddl);MUS_RS02360(murF);MUS_RS07800(spoVD);MUS_RS07825(murG);MUS_RS10505(dacC);MUS_RS11645(ponA);MUS_RS15825(uppP);MUS_RS18705(murAA)	K01921+K01929+K08384+K02563+K07259+K05366+K06153+K00790
Metabolism	Carbohydrate metabolism	Amino sugar and nucleotide sugar metabolism	11	40	0.7748307	0.99990720	ko00520	MUS_RS01145(glmS);MUS_RS06180(galT);MUS_RS06185(galE);MUS_RS06190(galK);MUS_RS10345(xynD);MUS_RS13510(manA);MUS_RS16605(csn);MUS_RS18705(murAA);MUS_RS19685(scrK);MUS_RS19690(gmuF);MUS_RS19770(galE)	K00820+K00965+K01784+K00849+K15921+K01809+K01233+K00790+K00847+K01809+K01784
Metabolism	Biosynthesis of other secondary metabolites	Monobactam biosynthesis	2	8	0.7791718	0.99990720	ko00261	MUS_RS01945(yclM);MUS_RS08000(sat)	K00928+K00958
Metabolism	Metabolism of other amino acids	Glutathione metabolism	2	8	0.7791718	0.99990720	ko00480	MUS_RS10540(ggt);MUS_RS18370(ywrD)	K00681+K00681
Cellular Processes	Cellular community - prokaryotes	Biofilm formation - Pseudomonas aeruginosa	1	4	0.7839143	0.99990720	ko02025	MUS_RS11830(trpE)	K01657
Organismal Systems	Immune system	NOD-like receptor signaling pathway	1	4	0.7839143	0.99990720	ko04621	MUS_RS18000(hag)	K02406
Genetic Information Processing	Folding, sorting and degradation	Sulfur relay system	3	12	0.7888332	0.99990720	ko04122	MUS_RS05800(thiS);MUS_RS05810(thiF);MUS_RS14140(iscS)	K03154+K03148+K04487
Metabolism	Global and overview maps	Microbial metabolism in diverse environments	49	169	0.8227697	0.99990720	ko01120	MUS_RS00085(glxK);MUS_RS00590(cysE);MUS_RS01490(ycdF);MUS_RS01725(adhB);MUS_RS01755(hxlB);MUS_RS01825(bsdB);MUS_RS01830(bsdC);MUS_RS01945(yclM);MUS_RS02000(gabT);MUS_RS02005(gabD);MUS_RS03675(yfmT);MUS_RS04065(acoC);MUS_RS04115(catE);MUS_RS05560(argD);MUS_RS07335(pdhD);MUS_RS08000(sat);MUS_RS08005(cysC);MUS_RS08010(sumT);MUS_RS08965(glnA);MUS_RS10250(kdgK);MUS_RS10260(--);MUS_RS10510(galM);MUS_RS…	K00865+K00640+K00034+K00121+K08094+K03186+K01612+K00928+K07250+K00135+K21802+K00627+K07104+K00821+K00382+K00958+K00860+K02303+K01915+K00874+K01625+K01785+K00266+K00265+K00058+K02160+K02768+K00123+K13767+K00104+K11473+K00134+K01647+K00873+K00872+K01733+K00003+K01466+K02083+K00632+K07516+K00851+K01428+K01429+K01430+K01808+K00374+K00370+K00260
Metabolism	Global and overview maps	Biosynthesis of secondary metabolites	79	267	0.8274477	0.99990720	ko01110	MUS_RS00590(cysE);MUS_RS01355(ilvE);MUS_RS01445(ansZ);MUS_RS01665(putB);MUS_RS01725(adhB);MUS_RS01825(bsdB);MUS_RS01945(yclM);MUS_RS03315(purB);MUS_RS03320(purC);MUS_RS03335(purL);MUS_RS03900(yfkN);MUS_RS04065(acoC);MUS_RS04130(NQO1);MUS_RS04470(katA);MUS_RS04660(yhcR);MUS_RS04820(plsC);MUS_RS05120(hemH);MUS_RS05410(asnO);MUS_RS05545(argC);MUS_RS05550(argJ);MUS_RS05555(argB);MUS_RS05560(argD);MUS…	K00640+K00826+K01424+K00318+K00121+K03186+K00928+K01756+K01923+K01952+K08693+K00627+K00355+K03781+K01081+K00655+K01772+K01953+K00145+K00620+K00930+K00821+K00611+K00549+K00382+K02303+K01752+K03621+K00981+K01785+K00266+K00265+K00655+K00817+K01695+K01696+K01817+K01609+K00766+K01657+K01736+K00940+K01823+K11752+K02160+K00283+K00282+K03526+K01809+K06209+K01704+K01703+K00052+K01649+K00053+K01653+K01652+…
Metabolism	Xenobiotics biodegradation and metabolism	Drug metabolism - other enzymes	2	9	0.8348257	0.99990720	ko00983	MUS_RS11855(ndk);MUS_RS13890(udk)	K00940+K00876
Cellular Processes	Cellular community - prokaryotes	Biofilm formation - Vibrio cholerae	2	9	0.8348257	0.99990720	ko05111	MUS_RS00590(cysE);MUS_RS08900(hfq)	K00640+K03666
Cellular Processes	Cell growth and death	Cell cycle - Caulobacter	3	13	0.8351799	0.99990720	ko04112	MUS_RS07820(spoVE);MUS_RS07825(murG);MUS_RS07840(ftsA)	K03588+K02563+K03590
Metabolism	Amino acid metabolism	Lysine biosynthesis	4	17	0.8409193	0.99990720	ko00300	MUS_RS01945(yclM);MUS_RS02360(murF);MUS_RS05560(argD);MUS_RS16410(hom)	K00928+K01929+K00821+K00003
Metabolism	Biosynthesis of other secondary metabolites	Novobiocin biosynthesis	1	5	0.8528137	0.99990720	ko00401	MUS_RS11800(hisC)	K00817
Genetic Information Processing	Transcription	RNA polymerase	1	5	0.8528137	0.99990720	ko03020	MUS_RS08055(rpoZ)	K03060
Metabolism	Metabolism of cofactors and vitamins	One carbon pool by folate	3	14	0.8724945	0.99990720	ko00670	MUS_RS08075(fmt);MUS_RS11150(dfrA);MUS_RS11155(thyA)	K00604+K00287+K00560
Genetic Information Processing	Translation	Ribosome	15	59	0.8901875	0.99990720	ko03010	MUS_RS00675(rpsL);MUS_RS00720(rplB);MUS_RS00725(rpsS);MUS_RS00730(rplV);MUS_RS00750(rpsQ);MUS_RS00755(rplN);MUS_RS00760(rplX);MUS_RS00775(rplF);MUS_RS00865(rplM);MUS_RS04500(rpsN);MUS_RS12470(rpmG2);MUS_RS14655(rplT);MUS_RS15555(rpmE2);MUS_RS20725(rpsR);MUS_RS21120(rpmF)	K02950+K02886+K02965+K02890+K02961+K02874+K02895+K02933+K02871+K02954+K02913+K02887+K02909+K02963+K02911
Metabolism	Energy metabolism	Sulfur metabolism	3	15	0.9021406	0.99990720	ko00920	MUS_RS00590(cysE);MUS_RS08000(sat);MUS_RS08005(cysC)	K00640+K00958+K00860
Genetic Information Processing	Folding, sorting and degradation	RNA degradation	3	15	0.9021406	0.99990720	ko03018	MUS_RS08900(hfq);MUS_RS13270(dnaK);MUS_RS18865(rho)	K03666+K04043+K03628
Metabolism	Energy metabolism	Carbon fixation in photosynthetic organisms	2	11	0.9097896	0.99990720	ko00710	MUS_RS14730(gapB);MUS_RS18785(rpiB)	K00134+K01808
Metabolism	Metabolism of cofactors and vitamins	Porphyrin metabolism	4	20	0.9222079	0.99990720	ko00860	MUS_RS05120(hemH);MUS_RS08010(sumT);MUS_RS16860(yvqK);MUS_RS19165(--)	K01772+K02303+K00798+K00435
Metabolism	Amino acid metabolism	Phenylalanine metabolism	1	7	0.9317899	0.99990720	ko00360	MUS_RS11800(hisC)	K00817
Metabolism	Energy metabolism	Methane metabolism	4	21	0.9395447	0.99990720	ko00680	MUS_RS01725(adhB);MUS_RS01755(hxlB);MUS_RS12010(serA);MUS_RS13570(yjgC)	K00121+K08094+K00058+K00123
Metabolism	Metabolism of cofactors and vitamins	Biotin metabolism	3	17	0.9435349	0.99990720	ko00780	MUS_RS05820(fabI);MUS_RS08165(fabG);MUS_RS17140(yvaG)	K00208+K00059+K00059
Metabolism	Lipid metabolism	Glycerophospholipid metabolism	4	22	0.953298	0.99990720	ko00564	MUS_RS04820(plsC);MUS_RS08155(plsX);MUS_RS08485(cdsA);MUS_RS11145(ypkP)	K00655+K03621+K00981+K00655
Metabolism	Metabolism of other amino acids	beta-Alanine metabolism	1	8	0.9535924	0.99990720	ko00410	MUS_RS02000(gabT)	K07250
Metabolism	Xenobiotics biodegradation and metabolism	Chloroalkane and chloroalkene degradation	1	8	0.9535924	0.99990720	ko00625	MUS_RS01725(adhB)	K00121
Genetic Information Processing	Translation	Aminoacyl-tRNA biosynthesis	5	27	0.9618688	0.99990720	ko00970	MUS_RS00460(lysS);MUS_RS00595(cysS);MUS_RS08075(fmt);MUS_RS13165(glyS);MUS_RS14555(pheS)	K04567+K01883+K00604+K01879+K01889
Metabolism	Metabolism of terpenoids and polyketides	Terpenoid backbone biosynthesis	2	14	0.9651865	0.99990720	ko00900	MUS_RS11920(fni);MUS_RS13075(ispG)	K01823+K03526
Metabolism	Global and overview maps	Carbon metabolism	22	92	0.9667221	0.99990720	ko01200	MUS_RS00590(cysE);MUS_RS01490(ycdF);MUS_RS01725(adhB);MUS_RS01755(hxlB);MUS_RS04065(acoC);MUS_RS04470(katA);MUS_RS07335(pdhD);MUS_RS08140(sdaAA);MUS_RS10250(kdgK);MUS_RS10260(--);MUS_RS12010(serA);MUS_RS12745(accB);MUS_RS12840(gcvPB);MUS_RS12845(gcvPA);MUS_RS13570(yjgC);MUS_RS14730(gapB);MUS_RS14790(citZ);MUS_RS14825(pyk);MUS_RS16695(fadN);MUS_RS17365(gntK);MUS_RS18785(rpiB);MUS_RS18850(maeA)	K00640+K00034+K00121+K08094+K00627+K03781+K00382+K01752+K00874+K01625+K00058+K02160+K00283+K00282+K00123+K00134+K01647+K00873+K07516+K00851+K01808+K00027
Metabolism	Metabolism of cofactors and vitamins	Riboflavin metabolism	1	10	0.9785432	0.99990720	ko00740	MUS_RS12110(ribD)	K11752
Metabolism	Carbohydrate metabolism	Glycolysis / Gluconeogenesis	7	38	0.9801626	0.99990720	ko00010	MUS_RS01725(adhB);MUS_RS04065(acoC);MUS_RS07335(pdhD);MUS_RS10510(galM);MUS_RS14730(gapB);MUS_RS14825(pyk);MUS_RS19610(licH)	K00121+K00627+K00382+K01785+K00134+K00873+K01222
Metabolism	Carbohydrate metabolism	Propanoate metabolism	5	30	0.9822444	0.99990720	ko00640	MUS_RS02000(gabT);MUS_RS02870(gldA);MUS_RS07335(pdhD);MUS_RS12745(accB);MUS_RS16735(adc)	K07250+K00005+K00382+K02160+K01574
Genetic Information Processing	Replication and repair	Mismatch repair	3	21	0.9824077	0.99990720	ko03430	MUS_RS13315(yqeN);MUS_RS14855(dnaE);MUS_RS18505(ssbB)	K02340+K02337+K03111
Genetic Information Processing	Replication and repair	Homologous recombination	3	21	0.9824077	0.99990720	ko03440	MUS_RS13315(yqeN);MUS_RS14855(dnaE);MUS_RS18505(ssbB)	K02340+K02337+K03111
Metabolism	Amino acid metabolism	Tryptophan metabolism	1	11	0.9854186	0.99990720	ko00380	MUS_RS04470(katA)	K03781
Metabolism	Amino acid metabolism	Lysine degradation	1	12	0.9900947	0.99990720	ko00310	MUS_RS02005(gabD)	K00135
Genetic Information Processing	Replication and repair	Base excision repair	1	12	0.9900947	0.99990720	ko03410	MUS_RS13105(nfo)	K01151
Metabolism	Carbohydrate metabolism	Citrate cycle (TCA cycle)	3	23	0.9904363	0.99990720	ko00020	MUS_RS04065(acoC);MUS_RS07335(pdhD);MUS_RS14790(citZ)	K00627+K00382+K01647
Metabolism	Amino acid metabolism	Arginine and proline metabolism	3	24	0.9929873	0.99990720	ko00330	MUS_RS01665(putB);MUS_RS16705(fadM);MUS_RS19225(rocA)	K00318+K00318+K00294
Metabolism	Carbohydrate metabolism	Pyruvate metabolism	6	38	0.9931314	0.99990720	ko00620	MUS_RS04065(acoC);MUS_RS07335(pdhD);MUS_RS12745(accB);MUS_RS14345(leuA);MUS_RS14825(pyk);MUS_RS18850(maeA)	K00627+K00382+K02160+K01649+K00873+K00027
Metabolism	Amino acid metabolism	Histidine metabolism	1	17	0.9985755	0.99990720	ko00340	MUS_RS11800(hisC)	K00817
Metabolism	Energy metabolism	Carbon fixation pathways in prokaryotes	1	24	0.9999072	0.99990720	ko00720	MUS_RS12745(accB)	K02160
